# Supplementary material for: Monitoring bacterial community structure and variability in time scale in full-scale anaerobic digesters
Source: Royal Society of Chemistry journal article supplement (doi:10.1039/c2em10958a), 2012-01-01
Supplement: c2em10958a_2.pdf [file c2em10958a_2.pdf]

**Supplemental Table 1.** Summary sequences of 16S rRNA gene fragments retrieved from the seven full-scale anaerobic digesters by using pyrosequencing

| Digester | Number of sequences from anaerobic digester sludge samples | Number of size filtered sequences <sup>a</sup> | Number of chimeric sequences <sup>b</sup> | Local database sequences | Mean size (bp) | Size range (bp) |
|----------|------------------------------------------------------------|------------------------------------------------|-------------------------------------------|--------------------------|----------------|-----------------|
| Total    | 90,781                                                     | 89,079                                         | 5,305                                     | 83,774                   | 486.88 ± 18.31 | 304 ~ 692       |
| S1-1     | 214                                                        | 153                                            | 14                                        | 139                      | 485.74 ± 18.49 | 439 ~ 526       |
| S1-2     | 854                                                        | 841                                            | 10                                        | 831                      | 497.96 ± 18.49 | 431 ~ 579       |
| S1-3     | 2,864                                                      | 2,828                                          | 5                                         | 2,823                    | 488.81 ± 18.39 | 331 ~ 563       |
| S1-4     | 1,783                                                      | 1,769                                          | 25                                        | 1,744                    | 488.29 ± 18.41 | 431 ~ 568       |
| S1-5     | 943                                                        | 930                                            | 86                                        | 844                      | 493.31 ± 20.21 | 431 ~ 544       |
| S1-6     | 1,060                                                      | 1,053                                          | 101                                       | 952                      | 496.83 ± 19.84 | 433 ~ 539       |
| S2-1     | 1,327                                                      | 979                                            | 41                                        | 938                      | 482.21 ± 15.10 | 429 ~ 535       |
| S2-2     | 1,836                                                      | 1,816                                          | 18                                        | 1,798                    | 494.22 ± 16.21 | 312 ~ 546       |
| S2-3     | 3,807                                                      | 3,750                                          | 331                                       | 3,419                    | 486.65 ± 17.00 | 338 ~ 692       |
| S2-4     | 2,304                                                      | 2,282                                          | 48                                        | 2,234                    | 488.97 ± 17.54 | 430 ~ 558       |
| S2-5     | 937                                                        | 932                                            | 124                                       | 808                      | 489.27 ± 19.00 | 428 ~ 610       |
| S2-6     | 1,040                                                      | 1,030                                          | 160                                       | 870                      | 486.08 ± 21.49 | 429 ~ 539       |
| J2-1     | 3,240                                                      | 3,177                                          | 111                                       | 3,066                    | 484.78 ± 18.83 | 428 ~ 565       |
| J2-2     | 4,907                                                      | 4,866                                          | 120                                       | 4,746                    | 489.02 ± 19.08 | 335 ~ 553       |
| J2-3     | 3,947                                                      | 3,892                                          | 386                                       | 3,506                    | 487.74 ± 17.25 | 430 ~ 590       |
| J2-4     | 1,613                                                      | 1,601                                          | 62                                        | 1,539                    | 487.17 ± 19.07 | 352 ~ 562       |
| J2-5     | 1,085                                                      | 1,072                                          | 147                                       | 925                      | 489.47 ± 21.10 | 420 ~ 550       |
| J2-6     | 1,246                                                      | 1,234                                          | 139                                       | 1,095                    | 488.37 ± 19.17 | 429 ~ 549       |
| J3-1     | 4,447                                                      | 4,406                                          | 74                                        | 4,332                    | 490.20 ± 20.24 | 429 ~ 556       |
| J3-2     | 1,229                                                      | 1,198                                          | 39                                        | 1,159                    | 492.45 ± 20.27 | 378 ~ 558       |
| J3-3     | 2,106                                                      | 2,079                                          | 77                                        | 2,002                    | 486.53 ± 19.54 | 409 ~ 565       |
| J3-4     | 2,704                                                      | 2,679                                          | 132                                       | 2,547                    | 486.71 ± 17.14 | 426 ~ 549       |
| J3-5     | 1,155                                                      | 1,139                                          | 124                                       | 1,015                    | 489.54 ± 20.24 | 429 ~ 540       |
| J3-6     | 1,080                                                      | 1,060                                          | 120                                       | 940                      | 488.41 ± 19.98 | 404 ~ 533       |
| N1-1     | 5,012                                                      | 4,908                                          | 262                                       | 4,646                    | 483.90 ± 17.46 | 426 ~ 548       |
| N1-2     | 5,133                                                      | 5,098                                          | 227                                       | 4,871                    | 487.03 ± 16.52 | 377 ~ 540       |
| N1-3     | 2,609                                                      | 2,571                                          | 309                                       | 2,262                    | 486.27 ± 16.21 | 304 ~ 546       |
| N1-4     | 2,035                                                      | 2,017                                          | 90                                        | 1,927                    | 488.07 ± 16.04 | 427 ~ 570       |
| N1-5     | 786                                                        | 781                                            | 98                                        | 683                      | 491.43 ± 16.59 | 426 ~ 530       |
| N1-6     | 1,244                                                      | 1,232                                          | 110                                       | 1,122                    | 491.23 ± 17.80 | 432 ~ 533       |
| N2-1     | 4,691                                                      | 4,367                                          | 289                                       | 4,078                    | 483.66 ± 17.38 | 426 ~ 554       |
| N2-3     | 3,081                                                      | 3,039                                          | 322                                       | 2,717                    | 487.79 ± 16.50 | 428 ~ 558       |
| N2-4     | 3,682                                                      | 3,637                                          | 378                                       | 3,259                    | 482.80 ± 19.66 | 430 ~ 559       |
| N2-5     | 1,169                                                      | 1,152                                          | 163                                       | 989                      | 486.48 ± 19.73 | 412 ~ 537       |
| T1-1     | 4,010                                                      | 3,983                                          | 48                                        | 3,935                    | 494.00 ± 17.10 | 332 ~ 552       |
| T1-2     | 1,443                                                      | 1,429                                          | 19                                        | 1,410                    | 500.40 ± 15.45 | 315 ~ 567       |
| T1-3     | 2,480                                                      | 2,461                                          | 71                                        | 2,390                    | 489.25 ± 16.74 | 425 ~ 550       |
| T1-4     | 2,811                                                      | 2,799                                          | 110                                       | 2,689                    | 489.30 ± 15.22 | 429 ~ 548       |
| T1-5     | 1,305                                                      | 1,291                                          | 160                                       | 1,131                    | 491.66 ± 19.11 | 431 ~ 546       |
| T1-6     | 1,562                                                      | 1,548                                          | 155                                       | 1,393                    | 491.96 ± 18.90 | 432 ~ 582       |

<sup>a</sup> Number of sequences after removing the sequences less than 300 bp in length.

<sup>b</sup> Chimeric sequences were determined by using Mothur's chimera slayer algorithm.

**Supplemental Table 2.** Comparison of diversity indices for bacterial 16S rRNA gene sequences retrieved from 40 sludge samples for the seven digesters

| Digester | No. of OTUs | No. of Sequences | Richness estimation <sup>a</sup> |                   |                         |                   |
|----------|-------------|------------------|----------------------------------|-------------------|-------------------------|-------------------|
|          |             |                  | <i>Chao1</i> <sup>b</sup>        |                   | <i>ACE</i> <sup>b</sup> |                   |
| Total    | 9,051       | 83,774           | 18,509                           | (17,795 ~ 19,281) | 27,835                  | (27,454 ~ 28,224) |
| S1-1     | 75          | 139              | 287                              | (167 ~ 566)       | 297                     | (216 ~ 425)       |
| S1-2     | 233         | 827              | 841                              | (598 ~ 1,243)     | 1,439                   | (1,246 ~ 1,669)   |
| S1-3     | 865         | 2,823            | 2,297                            | (1,994 ~ 2,681)   | 3,944                   | (3,721 ~ 4,186)   |
| S1-4     | 383         | 1,744            | 794                              | (668 ~ 976)       | 1,313                   | (1,167 ~ 1,487)   |
| S1-5     | 320         | 844              | 913                              | (720 ~ 1,201)     | 1,561                   | (1,349 ~ 1,817)   |
| S1-6     | 283         | 951              | 953                              | (720 ~ 1,311)     | 1,800                   | (1,539 ~ 2,116)   |
| S2-1     | 236         | 938              | 474                              | (387 ~ 612)       | 721                     | (620 ~ 850)       |
| S2-2     | 337         | 1,798            | 794                              | (641 ~ 1,024)     | 1,125                   | (993 ~ 1,284)     |
| S2-3     | 954         | 3,419            | 2,276                            | (2,004 ~ 2,619)   | 3,611                   | (3,413 ~ 3,824)   |
| S2-4     | 454         | 2,234            | 955                              | (811 ~ 1,157)     | 1,656                   | (1,486 ~ 1,854)   |
| S2-5     | 370         | 807              | 1,070                            | (853 ~ 1,382)     | 1,964                   | (1,724 ~ 2,247)   |
| S2-6     | 426         | 870              | 1,111                            | (915 ~ 1,386)     | 1,984                   | (1,748 ~ 2,263)   |
| J2-1     | 726         | 3,066            | 1,642                            | (1,422 ~ 1,931)   | 2,394                   | (2,280 ~ 2,518)   |
| J2-2     | 899         | 4,746            | 1,655                            | (1,487 ~ 1,869)   | 2,294                   | (2,201 ~ 2,393)   |
| J2-3     | 1,284       | 3,506            | 3,646                            | (3,219 ~ 4,168)   | 6,831                   | (6,546 ~ 7,132)   |
| J2-4     | 540         | 1,539            | 1,276                            | (1,082 ~ 1,540)   | 2,083                   | (1,876 ~ 2,323)   |
| J2-5     | 506         | 925              | 1,387                            | (1,152 ~ 1,707)   | 2,250                   | (1,985 ~ 2,562)   |
| J2-6     | 533         | 1,095            | 1,506                            | (1,250 ~ 1,852)   | 3,108                   | (2,792 ~ 3,467)   |
| J3-1     | 654         | 4,332            | 1,167                            | (1,036 ~ 1,344)   | 1,578                   | (1,517 ~ 1,643)   |
| J3-2     | 375         | 1,159            | 942                              | (764 ~ 1,202)     | 1,478                   | (1,304 ~ 1,685)   |
| J3-3     | 489         | 2,002            | 918                              | (797 ~ 1,087)     | 1,242                   | (1,121 ~ 1,386)   |
| J3-4     | 611         | 2,547            | 1,262                            | (1,097 ~ 1,482)   | 2,192                   | (2,101 ~ 2,288)   |
| J3-5     | 414         | 1,015            | 1,010                            | (837 ~ 1,253)     | 1,576                   | (1,381 ~ 1,811)   |
| J3-6     | 345         | 940              | 744                              | (620 ~ 924)       | 1,340                   | (1,182 ~ 1,529)   |
| N1-1     | 1,094       | 4,646            | 2,103                            | (1,902 ~ 2,355)   | 3,200                   | (3,055 ~ 3,355)   |
| N1-2     | 920         | 4,871            | 1,577                            | (1,429 ~ 1,769)   | 2,012                   | (1,925 ~ 2,107)   |
| N1-3     | 927         | 8,262            | 2,457                            | (2,136 ~ 2,862)   | 4,468                   | (4,224 ~ 4,730)   |
| N1-4     | 556         | 2,327            | 1,104                            | (960 ~ 1,300)     | 1,761                   | (1,602 ~ 1,943)   |
| N1-5     | 309         | 683              | 735                              | (600 ~ 933)       | 1,258                   | (1,077 ~ 1,482)   |
| N1-6     | 396         | 1,122            | 942                              | (782 ~ 1,170)     | 1,489                   | (1,307 ~ 1,707)   |
| N2-1     | 1,068       | 4,078            | 2,859                            | (2,483 ~ 3,335)   | 4,032                   | (3,842 ~ 4,235)   |
| N2-3     | 776         | 2,717            | 2,291                            | (1,944 ~ 2,742)   | 3,587                   | (3,251 ~ 3,968)   |
| N2-4     | 964         | 3,259            | 2,068                            | (1,842 ~ 2,354)   | 3,382                   | (3,197 ~ 3,584)   |
| N2-5     | 442         | 989              | 1,399                            | (1,116 ~ 1,802)   |                         | (2,402 ~ 3,004)   |
| T1-1     | 462         | 3,935            | 835                              | (724 ~ 992)       | 1,158                   | (1,048 ~ 1,288)   |
| T1-2     | 234         | 1,410            | 556                              | (439 ~ 740)       | 1,131                   | (974 ~ 1,322)     |
| T1-3     | 491         | 2,390            | 969                              | (836 ~ 1,154)     | 1,369                   | (1,229 ~ 1,535)   |
| T1-4     | 541         | 2,689            | 1,146                            | (988 ~ 1,361)     | 1,763                   | (1,586 ~ 1,970)   |
| T1-5     | 421         | 1,131            | 979                              | (821 ~ 1,200)     | 1,689                   | (1,487 ~ 1,929)   |
| T1-6     | 481         | 1,393            | 1,152                            | (970 ~ 1,402)     | 2,006                   | (1,789 ~ 2,259)   |

<sup>a</sup> Values are calculated at the 97% confidence intervals.

<sup>b</sup> The values indicate average and range (minimum to maximum).

**Supplemental Table 3.** Distribution of core OTUs among the 40 different anaerobic digester samples

| Digesters | Number of core OTUs |      |       |       |       |       |       |       |       |       |       |       |       |        |        |        |        |        |        |        |        |        |        |        |        |        |        |        |        |         |         |   |   |   |
|-----------|---------------------|------|-------|-------|-------|-------|-------|-------|-------|-------|-------|-------|-------|--------|--------|--------|--------|--------|--------|--------|--------|--------|--------|--------|--------|--------|--------|--------|--------|---------|---------|---|---|---|
|           | OTU5                | OTU6 | OTU11 | OTU36 | OTU38 | OTU42 | OTU46 | OTU62 | OTU65 | OTU68 | OTU84 | OTU89 | OTU95 | OTU103 | OTU105 | OTU110 | OTU128 | OTU129 | OTU172 | OTU207 | OTU270 | OTU280 | OTU396 | OTU414 | OTU453 | OTU458 | OTU462 | OTU662 | OTU986 | OTU1078 | OTU3884 |   |   |   |
| S1-1      | 26                  | 3    | 0     | 0     | 0     | 0     | 0     | 0     | 0     | 0     | 0     | 0     | 0     | 0      | 0      | 0      | 0      | 0      | 0      | 0      | 0      | 3      | 0      | 0      | 3      | 0      | 1      | 0      | 0      | 0       | 7       |   |   |   |
| S1-2      | 145                 | 184  | 23    | 0     | 0     | 8     | 0     | 51    | 4     | 3     | 0     | 0     | 0     | 0      | 0      | 0      | 0      | 0      | 0      | 0      | 7      | 1      | 1      | 0      | 5      | 0      | 8      | 5      | 0      | 0       | 0       |   |   |   |
| S1-3      | 590                 | 381  | 33    | 0     | 0     | 5     | 1     | 154   | 7     | 2     | 1     | 0     | 0     | 0      | 0      | 5      | 0      | 0      | 0      | 0      | 3      | 14     | 6      | 0      | 28     | 0      | 40     | 37     | 0      | 0       | 2       |   |   |   |
| S1-4      | 275                 | 259  | 62    | 0     | 0     | 19    | 2     | 69    | 14    | 15    | 8     | 0     | 0     | 0      | 0      | 7      | 0      | 0      | 0      | 0      | 10     | 17     | 6      | 0      | 22     | 0      | 32     | 18     | 0      | 1       | 0       |   |   |   |
| S1-5      | 110                 | 147  | 0     | 0     | 0     | 4     | 0     | 22    | 0     | 3     | 1     | 0     | 0     | 0      | 0      | 0      | 0      | 0      | 0      | 0      | 0      | 3      | 2      | 0      | 4      | 0      | 22     | 7      | 0      | 0       | 1       |   |   |   |
| S1-6      | 250                 | 238  | 0     | 0     | 0     | 2     | 0     | 17    | 3     | 9     | 4     | 0     | 0     | 0      | 0      | 6      | 0      | 0      | 0      | 0      | 0      | 1      | 1      | 0      | 1      | 0      | 26     | 7      | 0      | 0       | 0       |   |   |   |
| S2-1      | 0                   | 16   | 187   | 0     | 2     | 6     | 1     | 28    | 2     | 63    | 0     | 0     | 0     | 0      | 0      | 87     | 0      | 0      | 0      | 0      | 2      | 3      | 0      | 0      | 43     | 0      | 5      | 29     | 0      | 0       | 0       |   |   |   |
| S2-2      | 8                   | 110  | 407   | 0     | 0     | 53    | 3     | 83    | 56    | 102   | 1     | 0     | 0     | 0      | 0      | 30     | 0      | 0      | 0      | 0      | 29     | 14     | 0      | 0      | 21     | 0      | 4      | 7      | 0      | 1       | 0       |   |   |   |
| S2-3      | 7                   | 347  | 340   | 0     | 0     | 40    | 74    | 36    | 62    | 162   | 3     | 0     | 0     | 0      | 18     | 0      | 0      | 0      | 0      | 0      | 19     | 85     | 0      | 0      | 23     | 0      | 6      | 17     | 0      | 2       | 0       |   |   |   |
| S2-4      | 80                  | 291  | 114   | 0     | 0     | 88    | 17    | 44    | 75    | 194   | 1     | 0     | 0     | 0      | 30     | 0      | 0      | 0      | 0      | 0      | 32     | 20     | 1      | 0      | 9      | 2      | 30     | 8      | 0      | 1       | 0       |   |   |   |
| S2-5      | 19                  | 33   | 1     | 0     | 0     | 6     | 26    | 0     | 6     | 80    | 0     | 0     | 0     | 0      | 1      | 0      | 0      | 0      | 0      | 0      | 5      | 16     | 0      | 0      | 6      | 3      | 11     | 7      | 0      | 0       | 0       |   |   |   |
| S2-6      | 7                   | 9    | 3     | 0     | 0     | 1     | 14    | 0     | 0     | 86    | 0     | 0     | 0     | 0      | 0      | 0      | 0      | 0      | 0      | 0      | 0      | 27     | 0      | 0      | 6      | 28     | 0      | 10     | 0      | 0       | 2       |   |   |   |
| J2_1      | 8                   | 246  | 0     | 0     | 0     | 3     | 0     | 160   | 0     | 40    | 95    | 2     | 23    | 0      | 12     | 3      | 0      | 21     | 0      | 1      | 1      | 0      | 122    | 0      | 2      | 2      | 152    | 2      | 0      | 45      | 0       |   |   |   |
| J2_2      | 31                  | 552  | 34    | 0     | 48    | 17    | 0     | 218   | 31    | 63    | 61    | 4     | 118   | 0      | 100    | 16     | 2      | 7      | 0      | 1      | 11     | 0      | 33     | 0      | 3      | 8      | 121    | 6      | 0      | 28      | 0       |   |   |   |
| J2_3      | 2                   | 614  | 1     | 0     | 93    | 4     | 29    | 28    | 10    | 5     | 33    | 7     | 23    | 0      | 80     | 1      | 8      | 22     | 0      | 0      | 3      | 2      | 15     | 0      | 1      | 2      | 41     | 0      | 0      | 17      | 0       |   |   |   |
| J2_4      | 2                   | 228  | 1     | 0     | 24    | 3     | 3     | 29    | 10    | 5     | 41    | 6     | 4     | 0      | 34     | 1      | 0      | 8      | 0      | 0      | 1      | 2      | 29     | 0      | 0      | 8      | 1      | 0      | 50     | 0       | 0       |   |   |   |
| J2_5      | 5                   | 47   | 0     | 0     | 15    | 2     | 4     | 0     | 0     | 11    | 3     | 3     | 0     | 8      | 0      | 0      | 0      | 0      | 0      | 0      | 1      | 1      | 8      | 6      | 1      | 0      | 18     | 0      | 0      | 29      | 0       |   |   |   |
| J2_6      | 13                  | 19   | 0     | 0     | 103   | 1     | 0     | 6     | 0     | 1     | 24    | 2     | 2     | 0      | 10     | 0      | 0      | 0      | 0      | 0      | 0      | 10     | 9      | 1      | 0      | 0      | 17     | 0      | 0      | 15      | 0       |   |   |   |
| J3_1      | 13                  | 427  | 4     | 0     | 0     | 20    | 0     | 93    | 19    | 11    | 314   | 0     | 335   | 0      | 136    | 0      | 0      | 0      | 0      | 15     | 7      | 92     | 0      | 0      | 0      | 83     | 0      | 0      | 97     | 0       | 0       |   |   |   |
| J3_2      | 3                   | 79   | 0     | 0     | 0     | 4     | 0     | 17    | 2     | 0     | 112   | 0     | 46    | 0      | 36     | 0      | 0      | 2      | 0      | 0      | 7      | 2      | 12     | 0      | 0      | 8      | 0      | 0      | 12     | 0       | 0       |   |   |   |
| J3_3      | 1                   | 117  | 0     | 0     | 54    | 7     | 35    | 19    | 2     | 0     | 116   | 0     | 83    | 0      | 70     | 0      | 5      | 30     | 0      | 0      | 4      | 24     | 41     | 0      | 0      | 16     | 0      | 0      | 35     | 0       | 0       |   |   |   |
| J3_4      | 2                   | 113  | 0     | 0     | 207   | 7     | 12    | 34    | 1     | 0     | 154   | 2     | 141   | 1      | 93     | 0      | 7      | 32     | 0      | 0      | 7      | 22     | 41     | 3      | 0      | 1      | 13     | 0      | 0      | 29      | 0       |   |   |   |
| J3_5      | 1                   | 45   | 0     | 0     | 55    | 0     | 1     | 3     | 0     | 0     | 52    | 0     | 40    | 1      | 14     | 0      | 1      | 2      | 0      | 0      | 1      | 3      | 20     | 9      | 0      | 0      | 20     | 0      | 0      | 30      | 0       | 0 |   |   |
| J3_6      | 0                   | 20   | 0     | 0     | 169   | 1     | 0     | 2     | 0     | 0     | 20    | 2     | 34    | 7      | 3      | 0      | 6      | 0      | 0      | 0      | 1      | 2      | 10     | 4      | 0      | 0      | 13     | 0      | 0      | 18      | 0       | 0 |   |   |
| N1_1      | 0                   | 3    | 0     | 0     | 103   | 241   | 0     | 9     | 44    | 0     | 0     | 6     | 118   | 97     | 0      | 4      | 0      | 26     | 153    | 134    | 107    | 0      | 25     | 37     | 0      | 0      | 2      | 28     | 0      | 9       | 0       | 0 |   |   |
| N1_2      | 0                   | 7    | 0     | 0     | 410   | 214   | 0     | 18    | 4     | 0     | 0     | 1     | 150   | 66     | 0      | 0      | 4      | 46     | 22     | 185    | 0      | 24     | 9      | 0      | 0      | 1      | 0      | 0      | 1      | 0       | 0       | 0 |   |   |
| N1_3      | 0                   | 0    | 0     | 0     | 164   | 131   | 0     | 11    | 0     | 0     | 0     | 0     | 15    | 8      | 0      | 0      | 0      | 26     | 35     | 2      | 42     | 0      | 9      | 1      | 2      | 0      | 0      | 0      | 21     | 0       | 0       | 0 |   |   |
| N1_4      | 0                   | 0    | 0     | 0     | 190   | 272   | 0     | 6     | 4     | 0     | 0     | 0     | 1     | 23     | 17     | 0      | 0      | 9      | 15     | 2      | 38     | 0      | 13     | 9      | 7      | 0      | 0      | 0      | 2      | 0       | 0       | 0 |   |   |
| N1_5      | 0                   | 0    | 0     | 0     | 69    | 88    | 0     | 0     | 0     | 0     | 0     | 0     | 2     | 1      | 0      | 0      | 0      | 2      | 1      | 0      | 8      | 0      | 8      | 0      | 14     | 0      | 0      | 0      | 0      | 24      | 0       | 0 | 0 |   |
| N1_6      | 0                   | 0    | 0     | 0     | 148   | 191   | 0     | 0     | 0     | 0     | 0     | 0     | 20    | 13     | 0      | 0      | 0      | 2      | 0      | 0      | 2      | 0      | 5      | 0      | 9      | 0      | 0      | 0      | 31     | 0       | 0       | 0 | 0 |   |
| N2_1      | 0                   | 7    | 0     | 0     | 91    | 265   | 0     | 14    | 52    | 0     | 0     | 7     | 90    | 116    | 0      | 0      | 0      | 20     | 65     | 188    | 79     | 0      | 23     | 30     | 0      | 0      | 0      | 37     | 0      | 19      | 0       | 0 | 0 |   |
| N2_3      | 0                   | 3    | 0     | 0     | 4     | 875   | 0     | 3     | 19    | 0     | 0     | 8     | 39    | 56     | 0      | 1      | 0      | 39     | 12     | 16     | 2      | 0      | 16     | 34     | 3      | 0      | 0      | 19     | 0      | 3       | 0       | 0 | 0 |   |
| N2_4      | 0                   | 8    | 0     | 0     | 4     | 161   | 0     | 0     | 33    | 0     | 0     | 37    | 64    | 134    | 0      | 11     | 0      | 5      | 6      | 42     | 5      | 1      | 21     | 57     | 2      | 0      | 2      | 34     | 0      | 0       | 0       | 0 | 0 |   |
| N2_5      | 0                   | 1    | 0     | 0     | 10    | 91    | 0     | 0     | 2     | 0     | 0     | 5     | 11    | 17     | 0      | 1      | 0      | 0      | 0      | 11     | 3      | 0      | 8      | 6      | 17     | 0      | 0      | 10     | 0      | 0       | 0       | 0 | 0 |   |
| T1-1      | 0                   | 110  | 0     | 0     | 1679  | 9     | 0     | 15    | 0     | 0     | 129   | 0     | 109   | 8      | 62     | 0      | 120    | 82     | 14     | 0      | 3      | 8      | 31     | 7      | 1      | 0      | 49     | 0      | 0      | 19      | 0       | 0 |   |   |
| T1-2      | 1                   | 1    | 1     | 0     | 906   | 0     | 1     | 4     | 0     | 0     | 9     | 0     | 19    | 8      | 19     | 0      | 19     | 2      | 11     | 0      | 1      | 1      | 2      | 7      | 0      | 0      | 1      | 0      | 0      | 1       | 0       | 0 | 1 | 0 |
| T1-3      | 1                   | 30   | 200   | 0     | 677   | 4     | 3     | 65    | 17    | 0     | 31    | 0     | 38    | 7      | 18     | 0      | 33     | 56     | 25     | 0      | 0      | 1      | 6      | 3      | 1      | 0      | 23     | 1      | 0      | 5       | 0       | 0 | 0 |   |
| T1-4      | 0                   | 14   | 48    | 0     | 1085  | 1     | 2     | 29    | 2     | 0     | 68    | 0     | 37    | 24     | 77     | 0      | 38     | 26     | 24     | 0      | 1      | 7      | 23     | 10     | 0      | 0      | 26     | 0      | 0      | 2       | 0       | 0 | 0 |   |
| T1-5      | 1                   | 1    | 0     | 0     | 279   | 0     | 1     | 3     | 0     | 0     | 22    | 0     | 7     | 17     | 21     | 0      | 8      | 0      | 23     | 0      | 0      | 4      | 3      | 39     | 0      | 3      | 9      | 0      | 0      | 2       | 0       | 0 | 0 | 0 |
| T1-6      | 0                   | 26   | 0     | 0     | 243   | 38    | 1     | 0     | 8     | 0     | 28    | 0     | 9     | 42     | 16     | 0      | 2      | 3      | 2      | 0      | 0      | 47     | 8      | 2      | 4      | 0      | 0      | 5      | 0      | 0       | 0       | 0 | 0 | 0 |
